# Supplementary material for: Effectiveness of the BNT162b2 (Pfizer-BioNTech) and the ChAdOx1 nCoV-19 (Oxford-AstraZeneca) vaccines for reducing susceptibility to infection with the Delta variant (B.1.617.2) of SARS-CoV-2
Source: bioRxiv or medRxiv preprint supplement (doi:10.1101/2021.10.12.21264840), 2021-10-14
Supplement: Supplementary file [file media-1.pdf]

## S1 Demographics for Population of Interest

Table S1.1: Demographics for population of interest.

| Characteristic         | Variable                                    | Summary           |
|------------------------|---------------------------------------------|-------------------|
| Number of participants |                                             | 2,730,111         |
| Age (in years)         | <i>n</i>                                    | 2,730,111         |
|                        | <i>n</i> missing                            | 0                 |
|                        | Mean (standard deviation)                   | 42.1 (23.7)       |
|                        | Median (Q1, Q3)                             | 42.0 (23.0, 61.0) |
|                        | Range                                       | 0.0-109.0         |
| Sex                    | <i>n</i>                                    | 2,730,029         |
|                        | <i>n</i> missing                            | 82                |
|                        | Male, <i>n</i> (%)                          | 1,360,509 (49.8%) |
|                        | Female, <i>n</i> (%)                        | 1,369,520 (50.2%) |
| Ethnicity              | <i>n</i>                                    | 2,186,803         |
|                        | <i>n</i> missing                            | 543,308           |
|                        | Black, African, Black British, or Caribbean | 19,674 (0.9%)     |
|                        | Asian or Asian British                      | 37,353 (1.7%)     |
|                        | Another ethnic group                        | 83,079 (3.8%)     |
|                        | Mixed or multiple ethnic group              | 47,322 (2.2%)     |
|                        | White                                       | 1,999,375 (91.4%) |

Table S1.2: Vaccine doses administered by age group.<sup>1</sup>

| Age Group (years) | <i>n</i>  | <i>n</i> missing | No Doses        | One Dose        | Both Doses        |
|-------------------|-----------|------------------|-----------------|-----------------|-------------------|
| <18               | 518,696   | 0*               | 495,612 (95.5%) | 20,040 (3.9%)   | 3,044 (0.6%)      |
| 18-39             | 772,847   | 0*               | 274,896 (35.6%) | 115,213 (14.9%) | 382,738 (49.5%)   |
| 40-59             | 678,147   | 0*               | 111,745 (16.4%) | 30,041 (4.4%)   | 536,361 (79.1%)   |
| 60-79             | 545,019   | 0*               | 43,884 (8.1%)   | 8,515 (1.6%)    | 492,620 (90.4%)   |
| ≥80               | 158,964   | 0*               | 22,810 (14.3%)  | 3,720 (2.3%)    | 132,434 (83.3%)   |
| All               | 2,730,111 | 0*               | 954,189 (35.0%) | 178,699 (6.5%)  | 1,597,223 (58.5%) |

<sup>1</sup>As extracted on 3rd Sep 2021, not excluding those who died prior to having the vaccine or those who moved into or out of the area over the time period.

\*No missing values due to the definition that no recorded values means no doses administered.

## S2 MCMC Parameter Estimates, Trace Plots and Posterior Distributions

Table S2.1: Parameter median estimates and 95% credible interval for all model fits.

| Parameter        | Core Model<br>( $\gamma = 1/7$ ) | Sensitivity to $\gamma$<br>( $\gamma = 1/3$ ) | Sensitivity to $\gamma$<br>( $\gamma = 1/11$ ) | Double Recovered<br>( $\gamma = 1/7$ ) |
|------------------|----------------------------------|-----------------------------------------------|------------------------------------------------|----------------------------------------|
| $\beta$          | 0.406<br>[0.3893, 0.4425]        | 0.7581<br>[0.7239, 0.8146]                    | 0.3104<br>[0.2953, 0.3448]                     | 0.4303<br>[0.4121, 0.4702]             |
| $e_{1A}$         | 0.3851<br>[0.3425, 0.426]        | 0.3528<br>[0.3117, 0.3918]                    | 0.408<br>[0.3624, 0.4515]                      | 0.3637<br>[0.3194, 0.4058]             |
| $e_{2A}$         | 0.6402<br>[0.614, 0.6647]        | 0.6618<br>[0.6378, 0.6843]                    | 0.6247<br>[0.5964, 0.6513]                     | 0.633<br>[0.6066, 0.6582]              |
| $e_{1P}$         | 0.1954<br>[0.1041, 0.2809]       | 0.263<br>[0.1815, 0.3399]                     | 0.1436<br>[0.0452, 0.2353]                     | 0.1834<br>[0.0914, 0.2692]             |
| $e_{2P}$         | 0.8392<br>[0.8212, 0.8559]       | 0.8425<br>[0.8254, 0.8583]                    | 0.8369<br>[0.8181, 0.8549]                     | 0.8365<br>[0.8183, 0.8534]             |
| Initial $I$      | 54.0151<br>[48.4328, 59.5435]    | 46.6017<br>[40.3953, 52.3173]                 | 56.2925<br>[50.9526, 61.6423]                  | 54.0704<br>[48.4778, 59.5674]          |
| Initial $I_{1A}$ | 14.8932<br>[10.3012, 19.8382]    | 12.8806<br>[8.042, 18.6471]                   | 15.6489<br>[11.369, 20.1298]                   | 14.8604<br>[10.2687, 19.7842]          |
| Initial $I_{2A}$ | 2.4775<br>[0.93, 4.7359]         | 2.5871<br>[0.8709, 5.4459]                    | 2.6046<br>[1.0844, 4.7457]                     | 2.4337<br>[0.9037, 4.739]              |
| Initial $I_{1P}$ | 0.7469<br>[0.1234, 2.0681]       | 1.0026<br>[0.1587, 2.9233]                    | 0.6512<br>[0.1119, 1.7435]                     | 0.7594<br>[0.1288, 2.1112]             |
| Initial $I_{2P}$ | 2.9717<br>[1.3856, 5.1267]       | 3.5131<br>[1.409, 6.6521]                     | 2.8499<br>[1.4196, 4.7717]                     | 2.9786<br>[1.3647, 5.1574]             |
| $\mu_1$          | 0.8836<br>[0.4464, 0.9955]       | 0.8809<br>[0.5336, 0.9949]                    | 0.864<br>[0.3271, 0.9951]                      | 0.8809<br>[0.4259, 0.9957]             |
| $\mu_2$          | 0.0545<br>[0.0021, 0.2734]       | 0.0787<br>[0.0031, 0.3343]                    | 0.0592<br>[0.002, 0.309]                       | 0.0556<br>[0.0022, 0.2809]             |

$\beta$ : Transmission Rate,  $e_{ij}$  : Effectiveness of  $i$  doses of vaccine  $j$ , Initial  $I$ : Initial number of unvaccinated infected individuals, Initial  $I_{ij}$ : Initial number of infected individuals who have received  $i$  doses of vaccine  $j$ ,  $\mu_i$ : Infectiveness of an infected individual with  $i$  doses of either vaccine. For number of doses we have  $i \in \{1, 2\}$  and for vaccines  $j \in \{A, P\}$  for Oxford-AstraZeneca and Pfizer-BioNTech respectively.

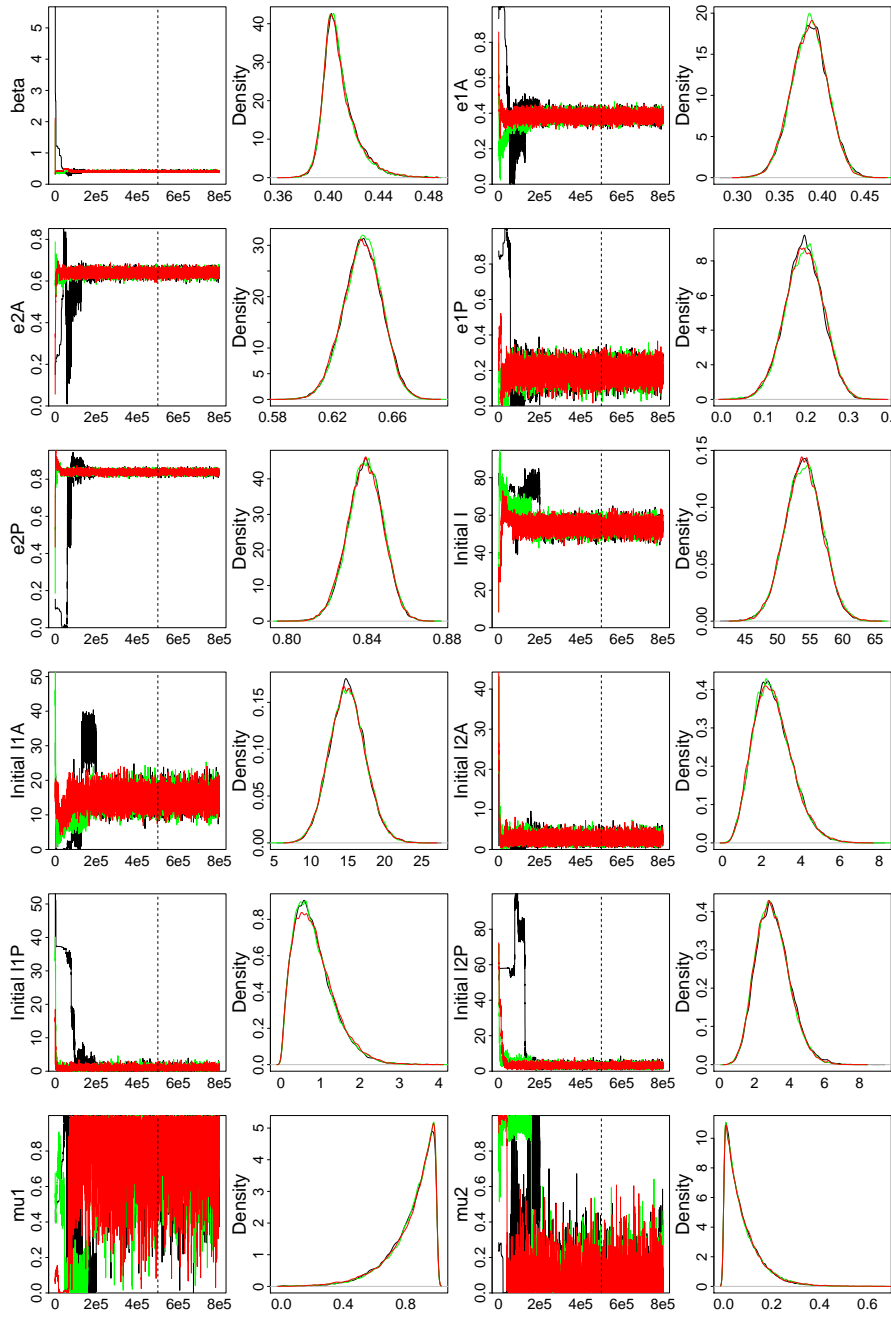

Figure S2.1: MCMC trace and posterior distributions for Core Model fit.

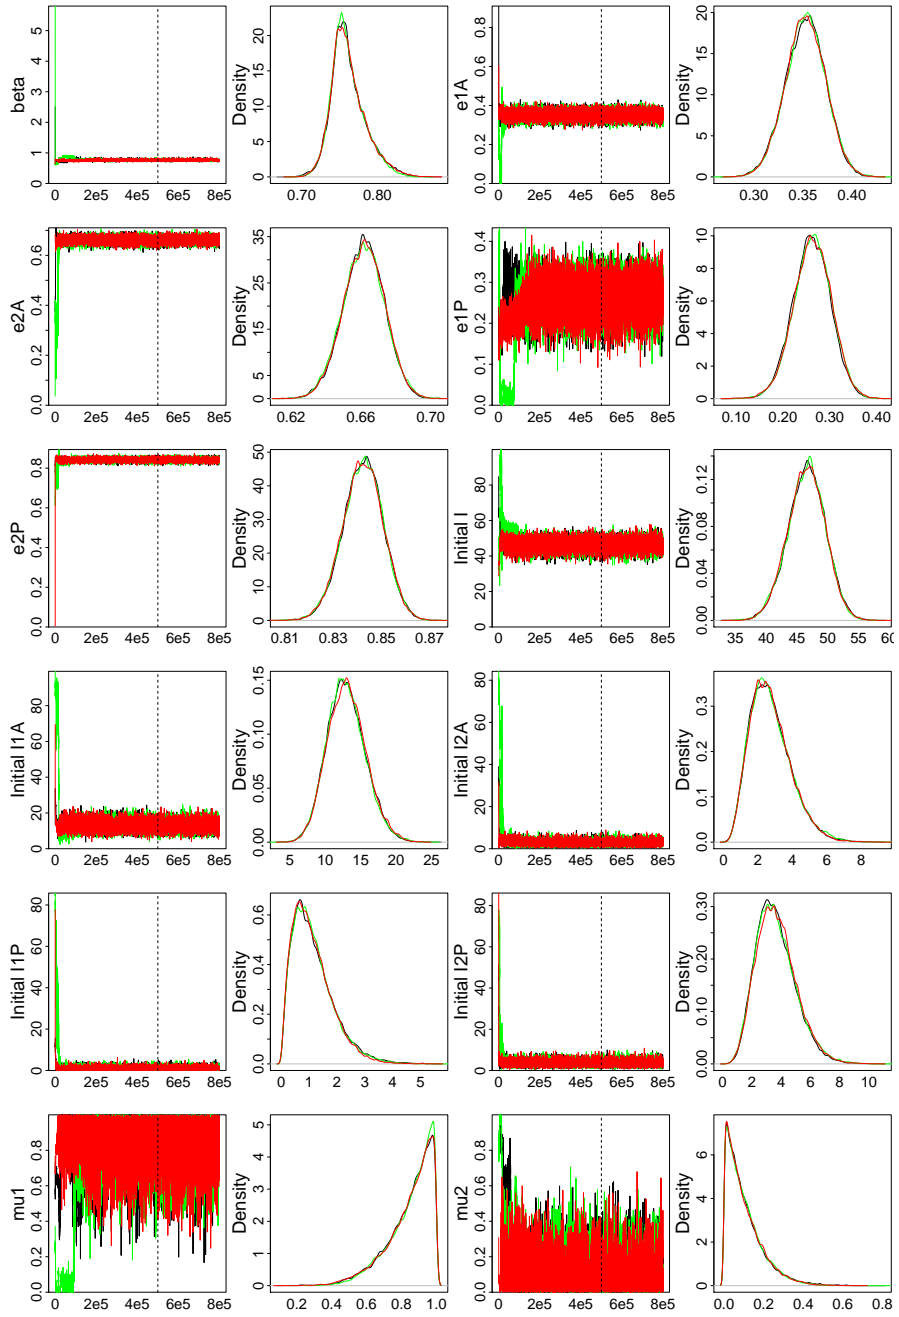

Figure S2.2: MCMC trace and posterior distributions for Sensitivity to  $\gamma$  ( $\gamma = 1/3$ ) fit.

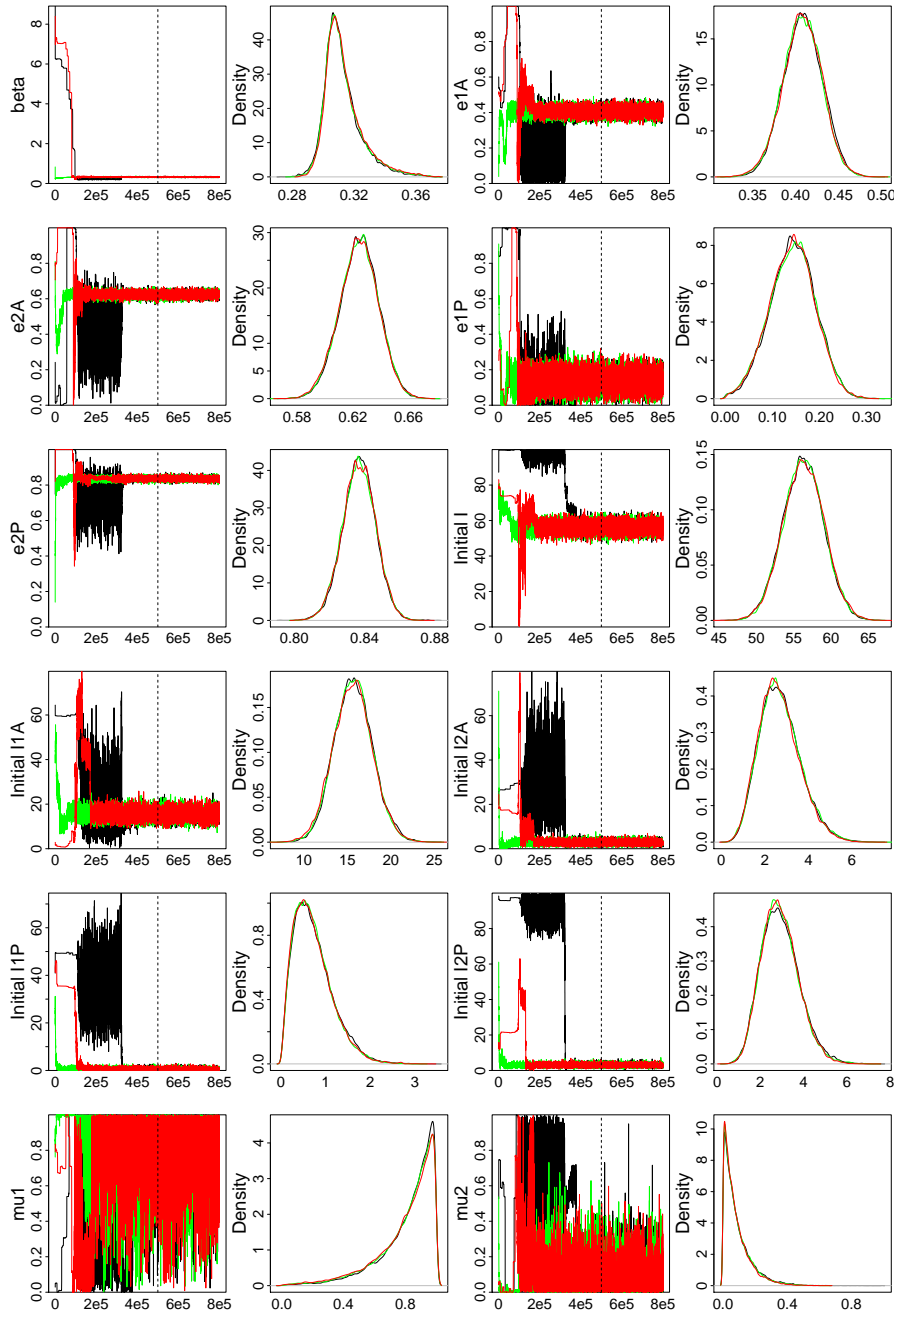

Figure S2.3: MCMC trace and posterior distributions for Sensitivity to  $\gamma$  ( $\gamma = 1/11$ ) fit.

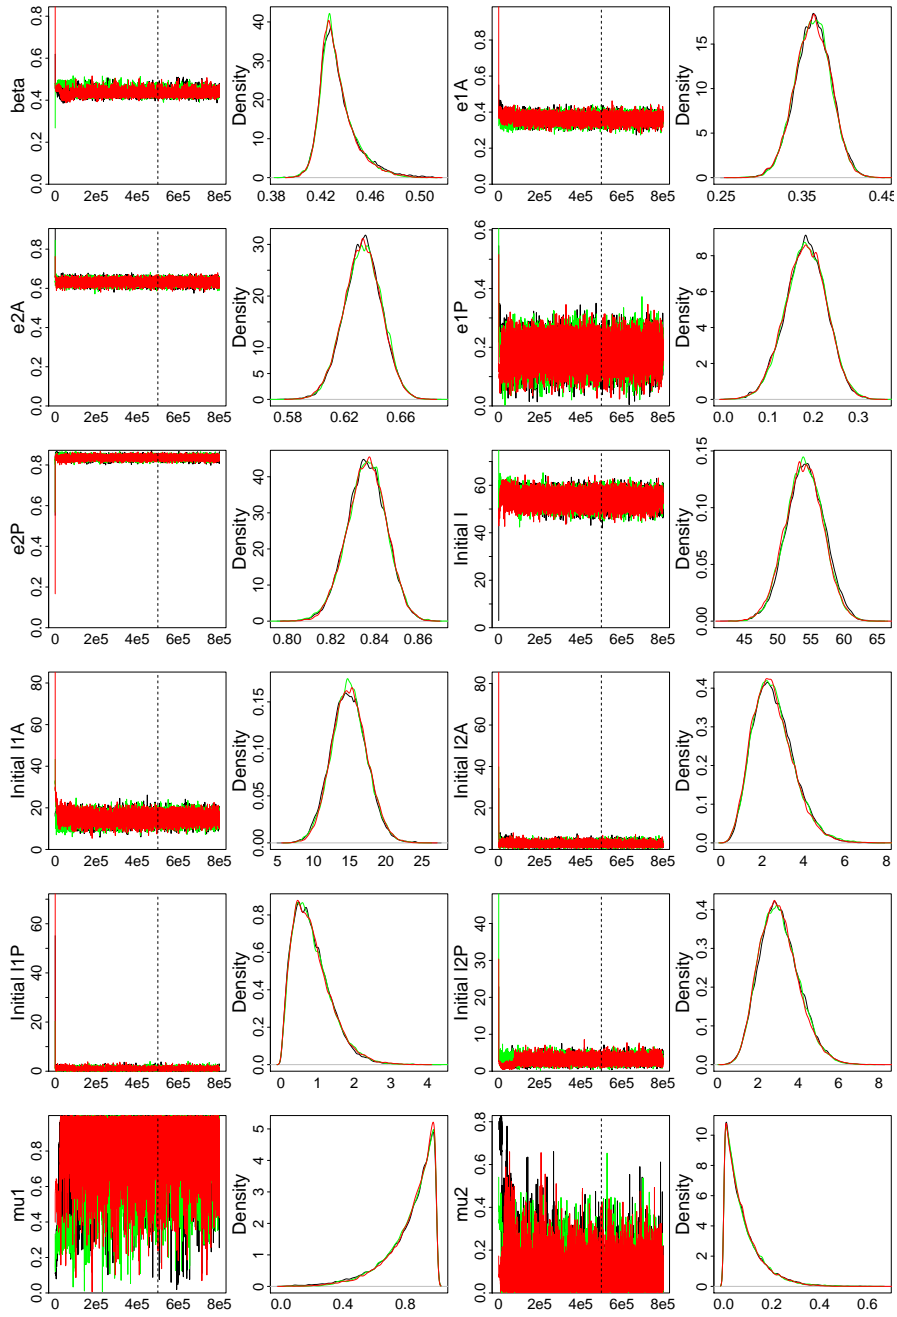

Figure S2.4: MCMC trace and posterior distributions for Double Removed fit.
